# Supplementary material for: Plasmonic effect-driven strategy for boosting photoelectrocatalytic degradation of rhodamine B using a SnS 2 /Au self-supported photoelectrode
Source: Royal Society of Chemistry journal article supplement (doi:10.1039/d5ra04205d), 2025-01-01
Supplement: d5ra04205d1.pdf [file d5ra04205d1.pdf]

**Plasmonic Effect-Driven Strategy for Boosting Photoelectrocatalytic  
Degradation of Rhodamine B using a SnS<sub>2</sub>/Au Self-Supported Photoelectrode**

*Yuanyuan Tian \**, *Qianqian Zhang*, *Jianjun Zhang*, *Chao Ren*, *Liu XiXin*  
Shanxi College of Technology, Shuozhou Shanxi Province, 036000, China.

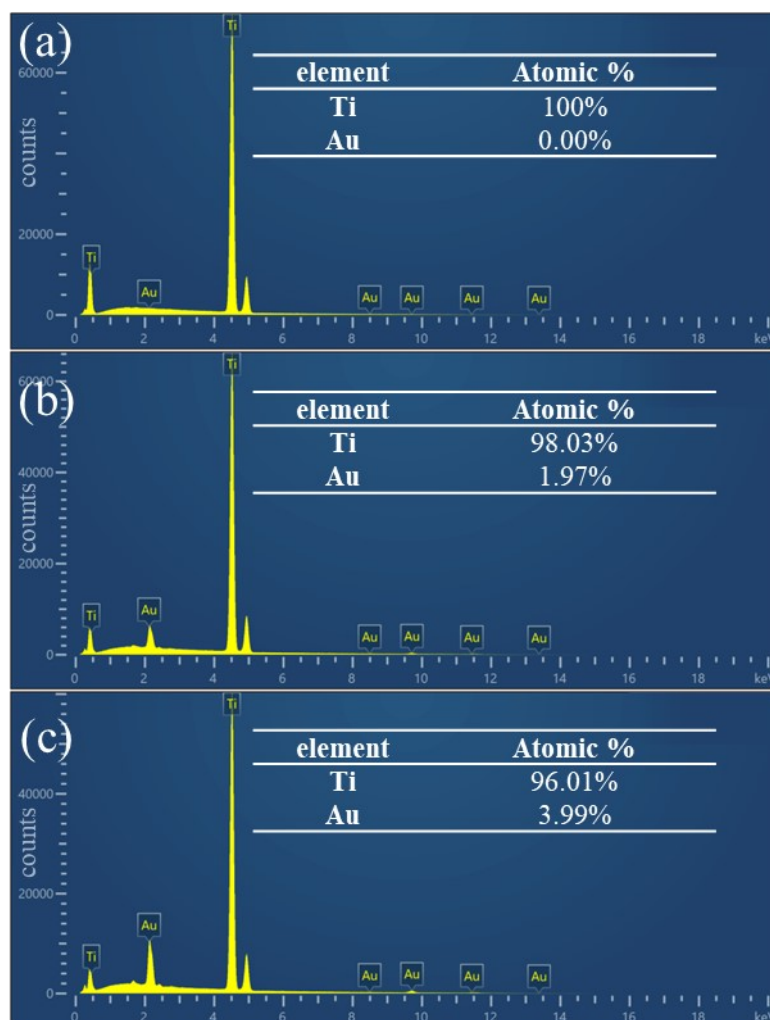

Figure S1. EDX spectra of (a) Ti foil, Au<sub>120</sub>/Ti foil, Au<sub>200</sub>/Ti foil, respectively.
